# Supplementary material for: Stable isotopes and C/N ratios in marine sediments as a tool for discriminating anthropogenic impact
Source: Royal Society of Chemistry journal article supplement (doi:10.1039/c1em10568j), 2011-01-01
Supplement: c1em10568j.pdf [file c1em10568j.pdf]

| Samples | Easting   | Northing   | pH   | Eh (mV) | $\delta^{15}\text{N}$ (‰) | $\delta^{13}\text{C}$ (‰) | TOC [wt%] | TN [wt%] | C/N   | Grain Size |          |          |          |
|---------|-----------|------------|------|---------|---------------------------|---------------------------|-----------|----------|-------|------------|----------|----------|----------|
|         |           |            |      |         |                           |                           |           |          |       | Gravel [%] | Sand [%] | Silt [%] | Clay [%] |
| NO03    | 437781    | 4521580    | 7,61 | -305,8  | 10,5                      | -26,1                     | 2,43      | -        | -     | 4,93       | 82,33    | 6,86     | 5,88     |
| NO05    | 437537    | 4521320    | 7,77 | -261,3  | 9,9                       | -26,3                     | 1,12      | 0,07     | 18,67 | 5,24       | 89,04    | 5,71     | -        |
| NO06    | 437446    | 4521200    | 7,31 | -218,8  | 13,8                      | -25,5                     | 0,49      | 0,19     | 3,01  | 9,04       | 78,75    | 10,38    | 1,83     |
| NO09    | 438065    | 4521680    | 7,7  | -155,7  | 9,5                       | -25,5                     | 1,2       | 0,05     | 28,00 | 0,54       | 74,77    | 21,32    | 3,37     |
| NO11    | 437760    | 4521350    | 7,31 | -187,8  | 6,4                       | -24,6                     | 2,59      | -        | -     | 7,78       | 55,85    | 26,8     | 9,57     |
| NO13    | 437594    | 4521150    | 7,16 | -45,9   | 6,1                       | -24,9                     | 1,67      | 0,06     | 32,47 | 3,08       | 82,37    | 13,1     | 1,46     |
| NO15    | 437358    | 4520770    | 7,55 | -268    | 3,8                       | -25,6                     | 1,48      | 0,12     | 14,39 | 3,19       | 88,19    | 8,62     | -        |
| NO16    | 438261    | 4521680    | 7,1  | -327,7  | 4,1                       | -25,7                     | 5,75      | 0,27     | 24,85 | 0,42       | 68,68    | 27,81    | 3,09     |
| NO21    | 437752    | 4521090    | 7,63 | -43,1   | 11,7                      | -26,4                     | 1,41      | 0,04     | 41,13 | 0,94       | 91,49    | 7,57     | -        |
| NO23    | 437501    | 4520760    | 7,56 | -281,5  | 3,1                       | -24,6                     | 2,21      | 0,14     | 18,42 | 1,35       | 75,67    | 18,8     | 4,18     |
| NO24    | 438268    | 4521530    | 7,4  | -375,8  | 2,6                       | -26,2                     | 3,68      | 0,37     | 11,60 | 1,28       | 84,09    | 13,3     | 1,33     |
| NO25    | 438168    | 4521400    | 7,69 | -280,7  | 2,9                       | -25,6                     | 2,73      | 0,09     | 35,39 | 12,15      | 67,99    | 16,88    | 2,98     |
| NO27    | 437980    | 4521170    | 7,51 | -222,4  | 10,4                      | -27,4                     | 1,51      | -        | -     | 2,93       | 71,78    | 23,09    | 2,2      |
| NO31    | 437634    | 4520720    | 7,38 | -298,2  | 2,9                       | -25,4                     | 3,01      | 0,22     | 15,96 | 0,4        | 70,93    | 22,94    | 5,73     |
| NO32    | 438480,06 | 4521557,56 | 7,81 | -453    | 2,0                       | -25,6                     | 5,54      | 0,29     | 22,29 | 16,63      | 80,21    | 3,16     | -        |
| NO33    | 438313    | 4521370    | 6,88 | -387    | 2,5                       | -26,1                     | 5,23      | 0,42     | 14,53 | 1,53       | 83,81    | 14,66    | -        |
| NO34    | 438137    | 4521150    | 7,74 | -208    | 3,3                       | -26,1                     | 3,4       | 0,11     | 36,06 | 3,35       | 73,65    | 21,79    | 1,21     |
| NO35    | 438081    | 4521030    | 7,45 | -225,3  | 7,5                       | -27,2                     | 1,54      | -        | -     | 1,79       | 66,45    | 29,11    | 2,65     |
| NO37    | 437906    | 4520810    | 7,43 | -244,7  | 3,9                       | -24,9                     | 3,09      | 0,09     | 40,06 | 11,66      | 48,52    | 36,03    | 3,79     |
| NO38    | 437804    | 4520710    | 7,76 | -248,7  | 3,4                       | -25,8                     | 5,1       | 0,28     | 21,25 | 0,62       | 80,84    | 14,18    | 4,36     |
| NO39    | 438282    | 4521170    | 7,64 | -270,8  | 4,2                       | -23,8                     | 5,97      | 0,11     | 63,32 | 18         | 64,75    | 14,79    | 2,46     |
| NO42    | 437970    | 4520680    | 7,25 | -312,1  | 3,5                       | -25,6                     | 4,91      | 0,25     | 22,91 | 1,87       | 69,42    | 22,67    | 6,04     |
| NO43    | 438582,4  | 4521574,55 | 7,81 | -296,7  | 3,5                       | -26,1                     | 4,46      | 0,17     | 30,61 | 1,31       | 89,37    | 9,32     | -        |
| NO44    | 438540    | 4521390    | 7,76 | -428    | 3,0                       | -25,5                     | 4,93      | 0,35     | 16,43 | 27,89      | 43,03    | 23,26    | 5,82     |
| NO45    | 438466    | 4521250    | 7,34 | -367    | 4,5                       | -24,4                     | 2,85      | 0,13     | 25,58 | 32,59      | 37,01    | 23,79    | 6,61     |
| NO47    | 438397    | 4520980    | 7,23 | -322    | 3,4                       | -25,2                     | 2,53      | 0,12     | 24,60 | 2,07       | 57,53    | 33,94    | 6,46     |
| NO48    | 438322    | 4520860    | 7,15 | -95,8   | 5,6                       | -25,8                     | 3,49      | 0,07     | 58,17 | 12,16      | 18,42    | 66,75    | 2,67     |
| NO49    | 438217,79 | 4520752,63 | 7,64 | -233,7  | 4,9                       | -24,3                     | 3,02      | 0,08     | 44,04 | 6,67       | 23,93    | 62,09    | 7,31     |
| NO50    | 438128    | 4520650    | 7,51 | -268,5  | 3,3                       | -25,7                     | 4,11      | 0,15     | 31,97 | 12,36      | 48,04    | 37,95    | 1,65     |
| NO51    | 438556    | 4521010    | 7,49 | -314,1  | 3,1                       | -26,5                     | 3,3       | 0,18     | 21,39 | 2,24       | 7,5      | 78,49    | 11,77    |
| NO53    | 438415    | 4520730    | 7,34 | -294,3  | 4,6                       | -25,0                     | 2,27      | 0,15     | 17,66 | 6,96       | 14,98    | 70,96    | 7,1      |

|      |        |         |      |        |      |       |      |      |       |       |       |       |       |
|------|--------|---------|------|--------|------|-------|------|------|-------|-------|-------|-------|-------|
| NO54 | 438282 | 4520610 | 7,35 | -320,2 | 3,3  | -26,3 | 4,98 | 0,19 | 30,58 | 6     | 14,71 | 69,78 | 9,51  |
| NO55 | 438416 | 4520580 | 7,5  | -185,6 | 3,6  | -26,0 | 3,92 | 0,21 | 21,78 | 0,52  | 2,84  | 83,46 | 13,18 |
| NO56 | 438608 | 4520860 | 7,42 | -252,2 | 3,4  | -26,0 | 2,28 | 0,11 | 24,18 | 3,4   | 12,51 | 76,08 | 8,01  |
| NO58 | 438546 | 4520560 | 7,41 | -235,9 | 2,9  | -25,8 | 4,46 | 0,22 | 23,65 | 0,3   | 3,16  | 78,15 | 18,39 |
| NO59 | 438780 | 4521680 | 7,07 | -326,6 | 3,2  | -27,3 | 2,91 | 0,18 | 18,86 | 2,07  | 23,09 | 61,63 | 13,21 |
| NO60 | 438784 | 4521520 | 7,24 | -390,5 | 3,1  | -27,3 | 3,84 | 0,35 | 12,80 | 3,03  | 22,11 | 68,05 | 6,81  |
| NO61 | 438798 | 4521380 | 7,14 | -366,1 | 4,3  | -27,0 | 4,35 | 0,27 | 18,80 | 2,04  | 19,33 | 67,4  | 11,23 |
| NO62 | 438695 | 4521110 | 7,11 | -184,8 | 3,3  | -26,0 | 2,49 | 0,11 | 26,41 | 7,64  | 15,04 | 64,43 | 12,89 |
| NO63 | 438712 | 4520950 | 7,28 | -230,5 | 3,7  | -26,1 | 2,76 | 0,09 | 35,78 | 3,24  | 14,02 | 68,35 | 14,39 |
| NO64 | 438722 | 4520780 | 7,21 | -56,4  | 3,9  | -25,9 | 2,01 | 0,09 | 26,06 | 11    | 24,72 | 54,76 | 9,52  |
| NO65 | 438672 | 4520570 | 7,49 | -194,5 | 4,0  | -25,7 | 2,29 | 0,08 | 33,40 | 4,95  | 73,41 | 16,83 | 4,81  |
| NO66 | 438705 | 4520420 | 7,8  | -303,2 | 3,9  | -25,9 | 3,6  | 0,14 | 30,00 | 4,31  | 36,54 | 48,86 | 10,29 |
| NO67 | 438887 | 4521590 | 7,55 | -294,9 | 3,7  | -26,9 | 1,02 | 0,04 | 29,75 | 1,14  | 20,08 | 65,65 | 13,13 |
| NO68 | 439027 | 4521550 | 6,6  | -346,1 | 2,8  | -27,2 | 4,17 | 0,33 | 14,74 | 0,8   | 28,11 | 57,55 | 13,54 |
| NO69 | 438970 | 4521430 | 7,16 | -350,4 | 8,9  | -27,1 | 2,7  | 0,23 | 13,70 | 1,03  | 58,65 | 36,65 | 3,67  |
| NO70 | 438925 | 4521320 | 7,31 | -36,3  | 3,2  | -26,7 | 3,47 | 0,24 | 16,87 | 0,25  | 44,6  | 47,63 | 7,52  |
| NO71 | 438835 | 4521210 | 7,37 | -316,8 | 2,4  | -26,3 | 3,3  | 0,16 | 24,06 | 0,79  | 9,54  | 78,91 | 10,76 |
| NO72 | 438839 | 4521060 | 7,04 | -187,7 | 2,7  | -25,6 | 2,44 | 0,17 | 16,75 | 3,78  | 13,48 | 71,46 | 11,28 |
| NO73 | 438839 | 4520900 | 7,11 | -231,5 | 5,2  | -25,7 | 0,92 | 0,02 | 53,67 | 25,3  | 29,07 | 39,93 | 5,7   |
| NO74 | 438784 | 4520680 | 7,17 | -237,3 | 4,4  | -25,2 | 2,39 | 0,18 | 15,49 | 5,05  | 30,66 | 59,47 | 4,82  |
| NO75 | 438998 | 4521150 | 7,84 | -312,8 | 4,4  | -25,8 | 2,51 | 0,19 | 15,41 | 15,85 | 17,38 | 61,43 | 5,34  |
| NO76 | 438955 | 4521020 | 7,05 | -205,6 | 5,6  | -25,4 | 2,26 | 0,14 | 18,83 | 0,59  | 94,42 | 4,99  | -     |
| NO77 | 438903 | 4520780 | 7,46 | -295,8 | 3,8  | -25,6 | 3,39 | 0,25 | 15,82 | 0,75  | 90    | 9,26  | -     |
| NO78 | 438810 | 4520530 | 7,3  | -227,9 | 4,0  | -25,4 | 3,21 | 0,25 | 14,98 | 10,09 | 67,95 | 18,82 | 3,14  |
| NO79 | 438822 | 4520360 | 7,15 | -151,4 | 3,9  | -25,3 | 3,35 | 0,26 | 15,03 | 1,78  | 80,31 | 12,79 | 5,12  |
| NO80 | 439285 | 4521430 | 7,48 | -26,8  | 6,4  | -25,9 | 0,29 | 0,12 | 2,82  | 0,34  | 44,81 | 48,52 | 6,33  |
| NO81 | 439233 | 4521280 | 7,53 | -120,4 | 7,0  | -26,6 | 0,86 | 0,14 | 7,17  | 2,33  | 52,25 | 39,5  | 5,92  |
| NO82 | 439184 | 4521130 | 7,21 | -211,4 | 2,9  | -26,1 | 2,09 | 0,24 | 10,16 | 1,75  | 67,61 | 24,26 | 6,38  |
| NO83 | 439090 | 4521030 | 7,71 | -272,5 | 12,2 | -25,3 | 1,3  | 0,12 | 12,64 | 1,62  | 79,37 | 16,29 | 2,72  |
| NO84 | 439014 | 4520880 | 7,1  | -197,2 | 4,0  | -25,8 | 3,5  | 0,25 | 16,33 | 0,67  | 99,33 | -     | -     |
| NO85 | 439379 | 4521360 | 7,33 | -310   | 4,1  | -25,8 | 1,84 | 0,14 | 15,33 | 4,7   | 59,39 | 29,93 | 5,99  |
| NO86 | 439326 | 4521190 | 7,77 | -68,2  | 2,5  | -26,6 | 0,59 | 0,01 | 68,83 | 0,15  | 73,52 | 20,13 | 6,2   |
| NO87 | 439272 | 4521010 | 6,7  | -230,8 | 4,1  | -24,5 | 7,23 | 0,74 | 11,40 | 15,48 | 70,61 | 12,7  | 1,21  |
| NO88 | 439162 | 4520930 | 7,5  | -34,6  | 4,9  | -25,8 | 4,49 | 0,81 | 6,47  | 29,71 | 66,73 | 3,56  | -     |
| NO89 | 439118 | 4520800 | 7,28 | -281,7 | 2,9  | -25,3 | 3,72 | 0,82 | 5,29  | 6,03  | 77,23 | 15,07 | 1,67  |
| NO90 | 439030 | 4520700 | 7,25 | -211,8 | 2,9  | -25,8 | 0,27 | 0,81 | 0,39  | 1,56  | 81,19 | 14,02 | 3,23  |

|       |        |         |      |        |     |       |      |      |       |       |       |       |       |
|-------|--------|---------|------|--------|-----|-------|------|------|-------|-------|-------|-------|-------|
| NO91  | 438932 | 4520610 | 7,21 | -276,6 | 2,8 | -25,9 | 3,8  | 0,79 | 5,61  | 9,18  | 70,35 | 16,75 | 3,72  |
| NO92  | 438936 | 4520460 | 6,95 | -119,4 | 5,6 | -25,2 | 3,89 | 0,85 | 5,34  | 16,32 | 56,93 | 23,26 | 3,49  |
| NO93  | 438935 | 4520280 | 7,28 | -244,3 | 4,6 | -24,8 | 5,05 | 0,81 | 7,27  | 3,96  | 78,23 | 16,19 | 1,62  |
| NO94  | 439401 | 4521090 | 7,01 | -173,4 | 3,2 | -25,5 | 2,59 | 0,8  | 3,78  | 2,42  | 81,59 | 13,59 | 2,4   |
| NO95  | 439609 | 4521280 | 7,5  | -142,4 | 7,5 | -26,8 | 0,69 | 0,88 | 0,91  | 0,15  | 70,88 | 24,62 | 4,35  |
| NO96  | 439676 | 4521231 | 7,55 | 82,4   | 7,9 | -26,4 | 0,29 | 0,01 | 33,83 | 0,65  | 54,8  | 40,1  | 4,46  |
| NO97  | 439596 | 4521140 | 7,37 | -32,6  | 8,2 | -25,2 | 0,57 | 0,88 | 0,76  | 0,85  | 82,14 | 14,79 | 2,22  |
| NO98  | 439509 | 4521020 | 7,48 | -101,4 | 3,5 | -26,1 | 1,47 | 0,83 | 2,07  | 7,09  | 75,79 | 14,14 | 2,98  |
| NO99  | 439423 | 4520920 | 7,5  | -100,3 | 2,7 | -26,0 | 1,97 | 0,8  | 2,87  | 0,62  | 28,08 | 64,82 | 6,48  |
| NO100 | 439629 | 4520980 | 7,3  | -302,5 | 7,7 | -26,1 | 1,69 | 0,1  | 19,72 | 2,99  | 82,28 | 12,4  | 2,33  |
| NO101 | 439575 | 4520850 | 7,3  | -260,3 | 3,4 | -26,1 | 1,15 | 0,08 | 16,77 | 0,12  | 45,07 | 46,98 | 7,83  |
| NO102 | 439734 | 4520920 | 7,18 | -297,2 | 2,6 | -26,3 | 1,61 | 0,1  | 18,78 | 0,1   | 85,79 | 11,54 | 2,57  |
| NO103 | 439714 | 4520770 | 7,64 | -330,3 | 2,0 | -26,1 | 1,49 | 0,1  | 17,38 | 0,71  | 59,2  | 38,09 | 2     |
| NO104 | 439906 | 4521120 | 6,46 | -240,2 | 3,1 | -26,4 | 4,48 | 0,37 | 14,13 | 0,95  | 49,53 | 42,77 | 6,75  |
| NO105 | 439881 | 4520980 | 7,62 | -75,5  | 2,5 | -26,1 | 0,99 | 0,07 | 16,50 | 0,88  | 69,2  | 26,6  | 3,32  |
| NO106 | 439850 | 4520840 | 7,8  | -45,1  | 8,7 | -27,3 | 0,23 | 0,02 | 13,42 | 0,88  | 63,7  | 32,05 | 3,37  |
| NO107 | 439857 | 4520690 | 7,2  | -375,8 | 1,2 | -26,1 | 1,78 | 0,13 | 15,97 | 0,2   | 32,37 | 56,19 | 11,24 |
| NO108 | 440007 | 4521070 | 7,1  | -281,7 | 2,1 | -26,8 | 1,39 | 0,14 | 11,58 | 1,45  | 92,77 | 5,79  | -     |
| NO109 | 440119 | 4521010 | 7,18 | -316,6 | 3,1 | -26,9 | 2,11 | 0,14 | 17,58 | 0,48  | 45,74 | 40,98 | 12,8  |
| NO110 | 440042 | 4520900 | 7,25 | -281,2 | 1,2 | -26,6 | 2,68 | 0,16 | 19,54 | 1,82  | 86,21 | 10,34 | 1,63  |
| NO111 | 439990 | 4520780 | 7,33 | -225,4 | 3,1 | -26,5 | 2,29 | 0,11 | 24,29 | 0,04  | 26,17 | 70,44 | 3,35  |
| NO112 | 439995 | 4520620 | 7,49 | -360,4 | 1,0 | -26,2 | 2,39 | 0,13 | 21,45 | 0,48  | 20,09 | 71,49 | 7,94  |
| NO113 | 440103 | 4520700 | 7,47 | -249,1 | 1,4 | -26,1 | 1,5  | 0,1  | 17,50 | 1,55  | 44,45 | 48,86 | 5,14  |
| NO114 | 440123 | 4520540 | 7,44 | -330,2 | 1,4 | -25,9 | 2,52 | 0,16 | 18,38 | 0,54  | 10,02 | 78,71 | 10,73 |
| NO115 | 440362 | 4520870 | 7,56 | -92,3  | 3,8 | -27,3 | 0,11 | 0,01 | 12,83 | 0,86  | 28,91 | 60,65 | 9,58  |
| NO116 | 440275 | 4520770 | 7,6  | 15,6   | 4,2 | -25,3 | 0,09 | 0,01 | 10,50 | 0,13  | 60,55 | 34,19 | 5,13  |
| NO117 | 440233 | 4520640 | 6,92 | -128,5 | 4,0 | -27,0 | 1,06 | 0,05 | 24,73 | 0,25  | 37,03 | 51,11 | 11,61 |
| NO118 | 440245 | 4520480 | 7,76 | -271,2 | 3,2 | -26,6 | 1,4  | 0,08 | 20,42 | 0,63  | 35,33 | 58,7  | 5,34  |
| NO119 | 440482 | 4520790 | 7,26 | -281,7 | 3,9 | -26,3 | 0,76 | 0,06 | 14,78 | 0,62  | 38,16 | 50,57 | 10,65 |
| NO120 | 440388 | 4520680 | 7,24 | -265,8 | 4,3 | -26,8 | 0,75 | 0,06 | 14,58 | 0,26  | 42,01 | 49,07 | 8,66  |
| NO121 | 440351 | 4520550 | 7,35 | -165,4 | 8,2 | -27,3 | 0,22 | 0,02 | 12,83 | 0,11  | 51,76 | 25,67 | 22,46 |
| NO122 | 440340 | 4520380 | 7,25 | -220,9 | 2,6 | -26,6 | 1,9  | 0,14 | 15,83 | 1,13  | 19,3  | 72,34 | 7,23  |
| NO123 | 440458 | 4520360 | 7,68 | -132,7 | 2,7 | -28,0 | 0,13 | 0,01 | 15,17 | 0,28  | 43,12 | 51,68 | 4,92  |
| NO124 | 440571 | 4520260 | 7,62 | -165,5 | 3,2 | -26,3 | 1,9  | -    | -     | 1,9   | 70,97 | 21,42 | 5,71  |
| NO125 | 440560 | 4520120 | 7,23 | -291,7 | 3,2 | -25,8 | 2,64 | 0,2  | 15,40 | 0,89  | 15,88 | 65,89 | 17,34 |
| NO126 | 440694 | 4520140 | 7,6  | -185,7 | 2,8 | -26,5 | 2,67 | 0,25 | 12,46 | 0,6   | 4,26  | 79,28 | 15,86 |

|       |        |         |      |        |      |       |      |      |       |       |       |       |       |
|-------|--------|---------|------|--------|------|-------|------|------|-------|-------|-------|-------|-------|
| NO127 | 440675 | 4520020 | 7,84 | -294,3 | 3,3  | -25,1 | 2,77 | 0,22 | 14,69 | 24,48 | 24,08 | 41,64 | 9,8   |
| NO129 | 440891 | 4520280 | 7,23 | -390,1 | 3,7  | -26,6 | 1,75 | 0,14 | 14,58 | 0,61  | 33,38 | 57,76 | 8,25  |
| NO130 | 440817 | 4520040 | 7,61 | -401,2 | 2,6  | -25,3 | 4,68 | 0,34 | 16,06 | 0,77  | 4,84  | 71,92 | 22,47 |
| NO131 | 440794 | 4519910 | 7,61 | -144,6 | 3,6  | -26,1 | 1,73 | 0,12 | 16,82 | 0,77  | 4,84  | 71,92 | 22,47 |
| NO133 | 441025 | 4520240 | 7,76 | -195,2 | 2,6  | -25,4 | 1,66 | 0,16 | 12,10 | 2,5   | 47,57 | 45,59 | 4,34  |
| NO134 | 440982 | 4520090 | 7,48 | -317,7 | 3,0  | -26,8 | 3,26 | 0,28 | 13,58 | 0,96  | 10,07 | 77,85 | 11,12 |
| NO136 | 440896 | 4519800 | 7,83 | -270,1 | 5,1  | -27,5 | 0,79 | 0,05 | 18,43 | 0,32  | 55,76 | 29,87 | 14,05 |
| NO138 | 441185 | 4520146 | 7,95 | -234,8 | 6,4  | -28,3 | 0,45 | 0,05 | 10,50 | 1,5   | 83,6  | 9,93  | 4,97  |
| NO139 | 441118 | 4520011 | 8,05 | -163,7 | 2,8  | -27,8 | 2,9  | 0,23 | 14,71 | 1,82  | 33,68 | 54,58 | 9,92  |
| NO140 | 441386 | 4520213 | 7,94 | -382,8 | 3,7  | -27,5 | 0,93 | 0,06 | 18,08 | 4,04  | 40,38 | 46,69 | 8,89  |
| NO141 | 441319 | 4520078 | 7,75 | -356,3 | 1,6  | -27,0 | 4    | 0,18 | 25,93 | 1,01  | 64,88 | 30,86 | 3,25  |
| NO142 | 441252 | 4519944 | 7,17 | -281,4 | 6,1  | -28,0 | 0,78 | 0,03 | 30,33 | 1,12  | 89,86 | 7,6   | 1,42  |
| NO143 | 441520 | 4520145 | -    | -325,7 | 4,8  | -27,6 | 0,42 | 0,04 | 12,25 | 1,85  | 73,72 | 15,27 | 9,16  |
| NO144 | 441453 | 4520011 | 7,26 | -310,6 | 5,7  | -27,8 | 0,74 | 0,06 | 14,39 | 0,35  | 51,94 | 39,04 | 8,67  |
| NO145 | 441386 | 4519877 | 7,46 | -297,1 | 7,4  | -27,8 | 0,52 | 0,03 | 20,22 | 0,29  | 61,79 | 31,93 | 5,99  |
| NO146 | 441654 | 4520078 | 7,17 | -320,5 | 7,9  | -26,8 | 0,46 | 0,03 | 17,89 | 0,47  | 56,62 | 37,31 | 5,6   |
| NO147 | 441587 | 4519944 | 7,55 | -302   | 7,3  | -28,4 | 0,32 | 0,03 | 12,44 | 0,25  | 62,83 | 33,03 | 3,89  |
| NO148 | 441520 | 4519810 | 7,57 | -174,7 | 9,0  | -27,7 | 0,37 | 0,03 | 14,39 | 1,51  | 47,48 | 51,01 | -     |
| NO149 | 441721 | 4519877 | 7,38 | -310,2 | 9,1  | -28,0 | 0,2  | 0,02 | 11,67 | 24,49 | 71,41 | 2,61  | 1,49  |
| NO150 | 441654 | 4519743 | -    | -      | 4,9  | -27,7 | 0,73 | 0,06 | 14,19 | 91,93 | 3,57  | 3,5   | 1,00  |
| NO151 | 441587 | 4519609 | 7,27 | -52,6  | 4,4  | -27,4 | 0,47 | 0,04 | 13,71 | 0,35  | 61,79 | 32,18 | 5,68  |
| NO152 | 441856 | 4519810 | 7,55 | -109,2 | 1,8  | -28,5 | 0,16 | 0,25 | 0,75  | 9,71  | 40,33 | 40,88 | 9,08  |
| NO153 | 441788 | 4519676 | 7,47 | -76,6  | 3,0  | -27,8 | 0,32 | 0,23 | 1,62  | 11,48 | 72,08 | 8,22  | 8,22  |
| NO154 | 441721 | 4519542 | 7,39 | -28,8  | 3,8  | -27,3 | 0,48 | 0,12 | 4,67  | 3,12  | 46,13 | 42,74 | 8,01  |
| NO155 | 441971 | 4519722 | 7,55 | -22,5  | 3,4  | -27,4 | 0,36 | 0,14 | 3,00  | 0,46  | 46,62 | 45,7  | 7,22  |
| NO156 | 441923 | 4519609 | 7,19 | -188,6 | 8,2  | -26,8 | 0,28 | 0,03 | 10,89 | 0,9   | 75,98 | 20,23 | 2,89  |
| NO157 | 441855 | 4519475 | 7,44 | 30,5   | 11,7 | -27,5 | 0,17 | 0,02 | 9,92  | 1,81  | 83,24 | 12,23 | 2,72  |
| NO158 | 442120 | 4519637 | 7,36 | -265   | 6,3  | -28,9 | 0,41 | 0,04 | 11,96 | 2,48  | 64,08 | 24,32 | 9,12  |
| NO159 | 442057 | 4519542 | 7,42 | 94,6   | 9,5  | -28,9 | 0,16 | 0,01 | 18,67 | 28,87 | 66,07 | 3,68  | 1,38  |
| NO160 | 441990 | 4519407 | 7,57 | -71,2  | 9,8  | -25,5 | 0,39 | 0,07 | 6,50  | 23,86 | 70,12 | 6,02  | -     |
| NO161 | 442258 | 4519609 | 7,68 | -93,4  | 6,4  | -28,6 | 0,2  | 0,01 | 23,33 | 0,22  | 32,01 | 53,5  | 14,27 |
| NO162 | 442124 | 4519340 | 7,59 | -201,7 | 6,4  | -27,4 | 0,41 | 0,04 | 11,96 | 1,74  | 81,99 | 13,02 | 3,25  |
| NO165 | 442258 | 4519273 | 7,61 | -161,7 | 7,5  | -27,9 | 0,21 | 0,03 | 8,17  | 2,28  | 94,6  | 1,87  | 1,25  |
| NO166 | 442392 | 4519206 | 7,58 | -52,8  | 8,3  | -27,8 | 0,28 | 0,03 | 10,89 | 0,84  | 81,96 | 15,18 | 2,02  |
| NO168 | 442526 | 4519139 | 7,68 | 25     | 13,5 | -26,4 | 0,34 | 0,08 | 4,96  | 28,49 | 49,64 | 18,42 | 3,45  |
| NO169 | 442459 | 4519005 | 7,75 | -118   | 8,8  | -27,4 | 0,08 | 0,02 | 4,67  | 2,21  | 81,88 | 14,46 | 1,45  |

|       |        |         |      |        |     |       |      |      |       |       |       |      |   |
|-------|--------|---------|------|--------|-----|-------|------|------|-------|-------|-------|------|---|
| NO170 | 437279 | 4520217 | 7,63 | 14,7   | 5,9 | -26,0 | 1,47 | 0,03 | 57,17 | 39,05 | 52,75 | 8,2  | - |
| NO175 | 439431 | 4520496 | 8,01 | -193,6 | 3,5 | -26,4 | 2,68 | 0,07 | 44,67 | 38,24 | 53,46 | 8,3  | - |
| NO181 | 440416 | 4519783 | 7,19 | -38,7  | 5,3 | -27,8 | 0,21 | 0,04 | 6,13  | 1,94  | 92,09 | 5,97 | - |
| NO186 | 441487 | 4519241 | 7,66 | -133,6 | 8,1 | -27,2 | 0,29 | 0,03 | 11,28 | 25,47 | 74,1  | 0,44 | - |

---
